# Supplementary material
Source: publisher figshare collection journal article supplement (https://sage.figshare.com/ndownloader/files/35118697)
Supplement: Supplementary file 1 [file 35118697]

**SUPPLEMENTARY FIGURE**


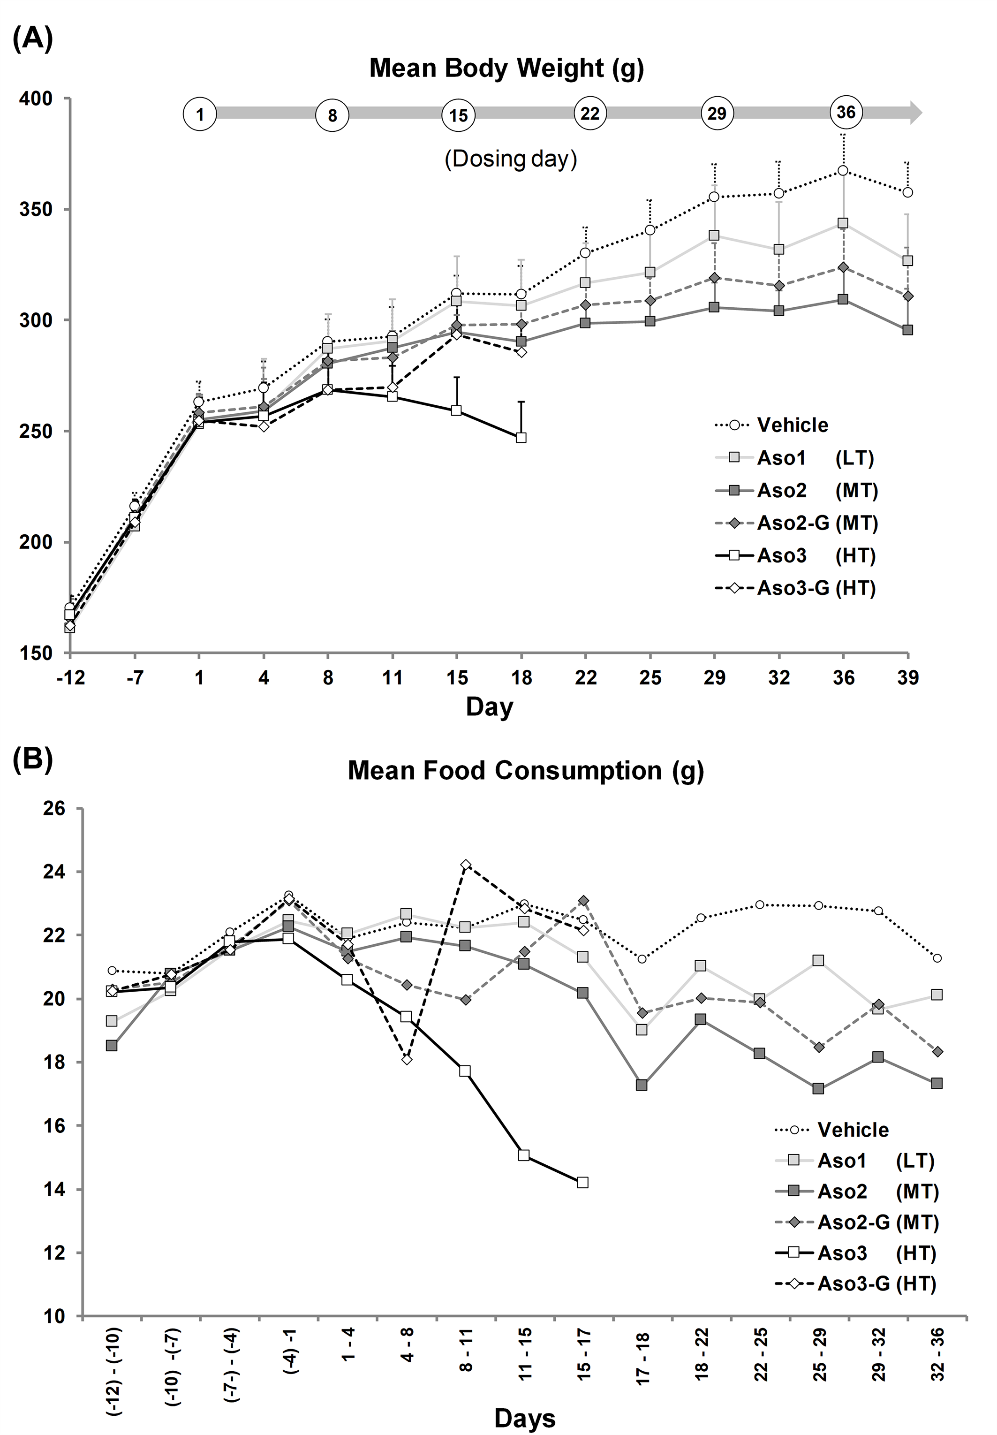


**Supplementary Figure 1.** Mean body weight (**A**), and mean food consumption (**B**). Pre-test and treatment period. Mean ±SD. Aso1 and Aso2/Aso2-G: n = 12 (until day 4), n = 8 (until day 18), n = 4 (until day 39). Aso3/Aso3-G: n = 8 (until day 4), n = 4 (until day 18).
